## REFERENCES

1. Bernard CM, Hill HF: The spinal nerve root sleeve is not a preferred route for redistribution of drugs from the epidural space to the spinal cord. *ANESTHESIOLOGY* 75:827-832, 1991
2. Shanthaveerappa PR, Bourne GH: The perineural epithelium a metabolically active, continuous, protoplasmic cell barrier surrounding peripheral nerve fasciculi. *J Anat* 96:527-537, 1962
3. Shantha TR, Bourne GH: The perineural epithelium: A new concept in the structure and function of the nervous system. New York, Academic Press, 1968, pp 374-459
4. Shantha TR, Evans JA: The relationship of epidural anesthesia

- to neural membranes and arachnoid villi. *ANESTHESIOLOGY* 37:543-557, 1972
5. Shantha TR, Bourne GH: Perineural epithelium: A new concept of its role in the integrity of the peripheral nervous system. *Science* 154:1464-1467, 1966
6. Welch K, Pollay M: The spinal arachnoid villi of the monkeys, *Cercopithecus aethiops* *cebus*, and *Macaca irus*. *Anat Rec* 145:43-48, 1963
7. Shantha TR, Bourne GH: Arachnoid villi in the optic nerve of man and monkey. *Exp Eye Res* 3:31-35, 1964

(Accepted for publication April 2, 1992.)

Anesthesiology  
77:218, 1992

*In Reply:*—I thank Shantha for his comments regarding our paper. However, I must disagree with his assertion that our study does not give proper attention to the histologic structure of the spinal nerve root sleeve. The purpose of our study was to investigate diffusion through the spinal nerve root cuff in a model as close to the *in vivo* situation as possible. To that end, we studied sections of spinal nerve and associated meninges extending from the spinal cord to the intervertebral foramen. These specimens, therefore, included all of the relevant histologic structures (e.g., root cuff, spinal nerve, dorsal root ganglion, perineural epithelium) in their normal anatomic relationships. This intact anatomically correct preparation is a strength of our model, not a weakness as suggested by Shantha in his first numbered comment. In fact, to dissect the nerve fascicles from the meninges, as suggested, would produce a highly artificial system, the results of which could not be applied to the intact tissue.

In response to Shantha's second point, as depicted in our paper (fig. 1), the preparation does include the extension of the subarachnoid space into the region of the dorsal root ganglion, and this extension is filled with cerebrospinal fluid (CSF). The subarachnoid space is bounded by the pia mater and does not communicate with the diffusion cell reservoirs in our model, because *in vivo* the pia mater lies between the subarachnoid space and the spinal cord. To remove the pia mater and allow the subarachnoid space to communicate with the fluid reservoirs would yield data on permeability between the epidural space and the subarachnoid space. However, as the title of our paper makes clear, we were interested in movement of drugs between the epidural space and the spinal cord. In addition, as we have shown previously,<sup>1</sup> the arachnoid mater accounts for nearly 90% of the resistance to diffusion through the meninges. Thus, removal of the pia mater to allow direct communication between the subarachnoid space and the fluid reservoirs would have little effect upon the results.

In response to point three, it is true that only 40% of root cuffs have arachnoid villi. Therefore, if the presence of arachnoid villi does in fact increase permeability through the root cuff, then 5 of the 13 root cuff specimens we studied should have had permeability coefficients significantly greater than specimens without a root cuff. However, not one was significantly more permeable than tissue that did not include a root cuff.

In response to point four, it is true that our model does not mimic epidural-CSF pressure gradients or include blood flow. However, drug redistribution *via* radicular artery blood flow is an issue separate from spinal nerve root cuff diffusion and thus is not a limitation of our model. Pressure across arachnoid villi can increase their permeability but only at pressures far greater than normal.<sup>2</sup> Therefore, the absence of a pressure gradient would not seem to be a limitation.

In his closing paragraph, Shantha expresses disbelief that solute per-

meability through the "thinned dural extensions" covering the nerve roots and through the arachnoid villi penetrating the dura is not greater than in other areas of the meninges. As we explained in our paper, the "thinness" of the dura is immaterial because the arachnoid mater is the overwhelming barrier to diffusion across the meninges.<sup>1</sup> The presence of arachnoid villi is ineffective in increasing permeability because: 1) their surface area is extremely small compared to the rest of the meninges (flux is proportional to surface area); 2) more contemporary studies have established that pores through the arachnoid villi exist only in pathologic states of markedly increased CSF pressure<sup>2,3</sup>; and 3) transport across arachnoid villi has been shown to occur by micropinocytosis and has only been observed to occur in one direction—from the CSF out into the epidural space, not from the epidural space into the CSF.<sup>4</sup>

In conclusion, I believe that our model accurately reflects the *in vivo* anatomy of the spinal nerve root cuff and that our conclusions are valid. In addition, the nonanatomic experiments proposed by Shantha are so removed from normal anatomy and histology that I cannot envision how they would be helpful.

CHRISTOPHER M. BERNARDS, M.D.  
Assistant Professor  
University of Washington  
Department of Anesthesiology  
Seattle, Washington 98195

## REFERENCES

1. Bernard CM, Hill HF: The permeability of morphine and alfentanil through the dura, arachnoid and pia mater of the dog and monkey. *ANESTHESIOLOGY* 73:1214-1219, 1990
2. Butler AB, Mann DJ, Maffeo CJ, Dacey RG, Johnson RN, Bass NH: Mechanisms of cerebrospinal fluid absorption in normal and pathologically altered arachnoid villi, *Neurobiology of Cerebrospinal Fluid*. Edited by Wood JH. New York, Plenum Press, 1983, pp 707-726
3. Alksne JF, Lovings ET: Functional ultrastructure of the arachnoid villus. *Arch Neurol* 27:371-377, 1972
4. Levine JE, Povlishock JT, Becker DP: The morphological correlates of primate cerebrospinal fluid absorption. *Brain Res* 241:31-41, 1982

(Accepted for publication April 2, 1992.)
